# Supplementary material for: Environmentally benign, sequential synthesis of 3,4-dihydro-2H-1,4-benzoxazines under phase transfer catalysis conditionsElectronic supplementary information (ESI) available: experimental details. See http://www.rsc.org/suppdata/gc/b3/b304095j/
Source: Royal Society of Chemistry journal article supplement (doi:10.1039/b304095j), 2003-01-01
Supplement: b304095j.doc [file b304095j.doc]

# Supplementary data

Environmentally Benign, Sequential Synthesis of 3,4-Dihydro-*2H*-1,4-Benzoxazines Under Phase Transfer Catalysis Conditions

Domenico Albanese,**a* Andrea Donghi,*a*Dario Landini,*a* Vittoria Lupi*a* and Michele Penso*b*

a Dipartimento di Chimica Organica e Industriale- Università degli Studi di Milano, via Venezian 21, 20133 Milano, Italia. Fax: 390250314159; Tel: 390250314165; Email:domenico.albanese@unimi.it

b Istituto CNR-ISTM, via Golgi 19, 20133 Milano, Italia

**General Remarks**: epoxides **1a,** (S)**-1b** are commercially available. Pellets of NaOH were ground with a mortar before use. 1H, and 13C NMR spectra were recorded in CDCl3 at 300.1 and 75.5 MHz using TMS (1H) as external standard and CHCl3 (13C) as internal standard. The coupling constants are in Hertz. Optical rotations were measured with a Perkin Elmer 241 instrument. Melting points are corrected.

***N*-(tosyl)-2-phenoxymethyl-3,4-dihydro-*2H*-1,4-benzoxazine (6a).**

**Method A.** A screw cap vial was charged with TBAF.3H2O (0.04 mmol, 13 mg), **2** (2 mmol, 531 mg) and stirred at 90 °C for 10 min. Epoxide **1a** (2 mmol, 300 mg) was added and mixture heated for 3h at 90 °C. NaOH 50% (20 mmol, 1 ml) and *n*-C14H29Me3N+Cl- (0.4 mmol, 116 mg) were added and the mixture heated at 90 °C for additional 1.5 h. After cooling, 4 ml of water were added and the mixture stirred for 30 min at 25 °C during which time a white precipitate was formed. The latter was filtered, washed with water (3 x 5 ml) affording 736 mg of **6a**, mp 107-108 °C, yield 93%. 1H NMR (CDCl3): δ 2.35 (s, 3H), 3.39 (dd, 1H, *J* = 9.9, 14.4), 3.65-3.69 (m, 1H), 3.92 (dd, 1H, *J* = 6.3, 10.2), 4.10 (dd, 1H, *J* = 4.5, 10.2), 4.48 (dd, 1H, *J* = 4.5, 14.4), 6.83-7.11 (m, 6H), 7.14 (d, 2H, *J* = 8.1), 7.25-7.32 (m. 2H), 7.49 (d, 2H, *J* = 8.1), 7.88 (dd, 1H, *J* = 1.5, 8.1). 13C NMR (CDCl3, selected data): δ 21.5, 46.2, 67.2, 69.6. Anal. Calcd. for C22H21NO4S: C, 66.82; H, 5.35; N, 3.54. Found: C, 67.05; H, 5.41; N, 3.79.

**Method B.** A screw cap vial was charged with TEBA (0.04 mmol, 9 mg), KF (0.08 mmol, 5 mg), **2** (2 mmol, 531 mg) and stirred at 90 °C for 10 min. Epoxide **1a** (2 mmol, 300 mg) was added and mixture heated for 4h at 90 °C. NaOH 50% (20 mmol, 1 ml) and *n*-C14H29Me3N+Cl- (0.4 mmol, 116 mg) were added and the mixture heated at 90 °C for additional 2 h. After cooling, 4 ml of water were added and the mixture stirred for 30 min at 25 °C during which time a white precipitate formed. The latter was filtered, washed with water (3 x 5 ml) affording 704 mg of **6a**, yield 89%, mp 108-109 °C, whose spectrosopical data were identical with those previously reported.

***N*-(tosyl)-(2*R)*-benzyloxymethyl-3,4-dihydro-*2H*-1,4-benzoxazine (6b)**: A screw cap vial was charged with TBAF.3H2O (0.04 mmol, 13 mg), **2** (2 mmol, 531 mg) and stirred at 90 °C for 10 min. Epoxide (*S*)-**1b** (2 mmol, 328 mg) is added and mixture heated for 4h at 90 °C. NaOH 50% (20 mmol, 1 ml) and *n*-C14H29Me3N+Cl- (0.4 mmol, 116 mg) were added and the mixture heated at 90 °C for additional 3 h. After cooling, 4 ml of water were added and the mixture stirred for 30 min at 25 °C during which time a white precipitate was formed. The latter was filtered, washed with water (3 x 5 ml) affording 745 mg of (*R*)-**6b**, yield 91%, mp 104-105 °C, [a]D20 = - 42.2 (c = 1, CH2Cl2). Rt: 6.87 min (CHIRALPAK® ADTM, iPrOH/hexane, 40:60, 210 nm); Rt of (±)-**6b**: 6.84, 7.60 min.1H NMR (CDCl3): δ 2.37 (s, 3H), 3.28 (m, 1H), 3.51 (m, 3H), 4.34 (dd, 1H, *J* = 2.0, 14.2), 4.52 (dd, 2H, *J* = 12.4, 14.6), 6.82 (dd, 1H, *J* = 1.6, 8.1), 6.92 (m, 1H), 7.05 (m, 1H), 7.20 (d, 2H, *J* = 8.3), 7.28-7.38 (m, 5H), 7.50 (d, 2 H, *J* = 8.3), 7.83 (dd, 1 H, *J* = 1.6, 8.3). 13C NMR (CDCl3, selected data): δ 21.5, 46.3, 69.6, 70.7, 73.5. Anal. Calcd. for C23H23NO4S: C, 67.46; H, 5.66; N, 3.42. Found: C, 67.97; H, 5.98; N, 3.75.

*N*-(tosyl)-2-phenoxymethyl-6-nitro-3,4-dihydro-*2H*-1,4-benzoxazine (7a): A screw cap vial was charged with TBAF.3H2O (0.04 mmol, 13 mg), 3 (2 mmol, 621 mg) and stirred at 90 °C for 10 min. Epoxide 1a (2 mmol, 300 mg) was added and mixture heated for 5h at 90 °C. NaOH 50% (20 mmol, 1.04 ml) and *n*-C14H29Me3N+Cl- (0.4 mmol, 116 mg) were added and the mixture heated at 90 °C for additional 20 min. After cooling, 4 ml of water were added and the mixture stirred for 30 min at 25 °C during which time a white precipitate was formed. The latter was filtered, washed with water (3 x 5 ml) affording 810 mg of 7a, yield 92%, mp 163-4 °C. 1H NMR (CDCl3, 300 MHz): δ 2.38 (s, 3H), 3.47 (dd, 1H, *J* = 9.3, 14.4), 3.89 (m, 1H), 4.01 (dd, 1H, *J* = 5.7, 10.2), 4.16 (dd, 1H, *J* = 4.4, 10.2), 4.50 (dd, 1H, *J* = 2.4, 14.4), 6.86-7.04 (m, 4H), 7.22 (d, 2H, *J* = 8.1), 7.28-7.34 (m, 3H), 7.59 (d, 2H, *J* = 8.1), 7.96 (dd, 1H, *J* = 2.7, 9.0). Anal. Calcd. for C22H20N2O6S: C, 59.99; H, 4.58; N, 6.36. Found: C, 60.46; H, 4.80; N, 6.02.
